# Supplementary material
Source: publisher site journal article supplement (https://static.cambridge.org/content/id/urn:cambridge.org:id:article:S0003055421000617/resource/name/S0003055421000617supp001.pdf)
Supplement: Supplementary file 1 [file S0003055421000617supp001.pdf]

## Supplementary Materials

**Supplementary Table A.1.**

**Placebo Test of Impact of Party Competition in Other Spending Areas, 1880–1980**

|                               | Public Safety Spending |                   | Social Service Spending |                     | Other Spending Categories |                     |
|-------------------------------|------------------------|-------------------|-------------------------|---------------------|---------------------------|---------------------|
| Legislative Party Competition | \$0.18<br>(0.18)       | \$0.09<br>(0.14)  | -\$0.15<br>(0.45)       | -\$0.70**<br>(0.36) | \$0.95<br>(0.81)          | -\$0.20<br>(0.76)   |
| Electoral Competition         |                        | -0.32**<br>(0.18) |                         | 1.07**<br>(0.45)    |                           | 0.19<br>(1.19)      |
| Democratic House              |                        | -4.89<br>(8.75)   |                         | 70.99***<br>(23.24) |                           | 57.37<br>(38.79)    |
| Democratic Senate             |                        | 20.60<br>(13.69)  |                         | 26.51<br>(32.15)    |                           | 36.24<br>(60.08)    |
| Democratic Governor           |                        | -3.98<br>(5.75)   |                         | -33.33**<br>(16.84) |                           | -42.92<br>(40.73)   |
| Income Per Capita             |                        | 0.02***<br>(0.00) |                         | 0.01**<br>(0.01)    |                           | 0.03**<br>(0.02)    |
| Foreign-Born %                |                        | -3.56**<br>(1.66) |                         | -2.45<br>(2.85)     |                           | -18.46***<br>(6.17) |
| Black %                       |                        | 1.15<br>(1.17)    |                         | 3.20<br>(3.28)      |                           | 6.03<br>(6.99)      |
| Other Non-White %             |                        | 1.21<br>(5.32)    |                         | 6.35<br>(7.45)      |                           | 47.31***<br>(15.59) |
| Urban Population %            |                        | 1.56<br>(1.08)    |                         | -2.45<br>(1.79)     |                           | 6.36**<br>(3.57)    |
| State Fixed Effects           | <i>included</i>        | <i>included</i>   | <i>included</i>         | <i>included</i>     | <i>included</i>           | <i>included</i>     |
| Year Fixed Effects            | <i>included</i>        | <i>included</i>   | <i>included</i>         | <i>included</i>     | <i>included</i>           | <i>included</i>     |
| Observations                  | 396                    | 378               | 396                     | 378                 | 326                       | 310                 |
| R-squared                     | 0.89                   | 0.93              | 0.92                    | 0.93                | 0.88                      | 0.91                |

*Note: Table entries are regression coefficients, with standard errors clustered by state in parentheses. \*\*\* p<0.01, \*\* p<0.05, \* p<0.10 in a one-tailed test.*

**Supplementary Table A.2.**  
**Party Competition Predicts Higher Human Capital Spending, 1880-1960**

|                               | Education Spending |                 | Health Spending |                 | Transportation Spending |                 |
|-------------------------------|--------------------|-----------------|-----------------|-----------------|-------------------------|-----------------|
| Legislative Party Competition | 0.98***            | 0.72**          | 0.23**          | 0.12            | 0.20                    | 0.15            |
|                               | (0.28)             | (0.31)          | (0.10)          | (0.09)          | (0.29)                  | (0.25)          |
| Electoral Competition         |                    | -0.29           |                 | 0.15            |                         | 0.20            |
|                               |                    | (0.38)          |                 | (0.12)          |                         | (0.44)          |
| Democratic House              |                    | -3.30           |                 | -9.88**         |                         | -23.91          |
|                               |                    | (19.17)         |                 | (4.36)          |                         | (17.08)         |
| Democratic Senate             |                    | 29.15*          |                 | -3.63           |                         | -22.85          |
|                               |                    | (14.63)         |                 | (3.40)          |                         | (19.69)         |
| Democratic Governor           |                    | -10.09          |                 | 3.10            |                         | -1.77           |
|                               |                    | (12.63)         |                 | (3.14)          |                         | (14.19)         |
| Income Per Capita             |                    | 0.012**         |                 | 0.008***        |                         | 0.00            |
|                               |                    | (0.01)          |                 | (0.00)          |                         | (0.00)          |
| Foreign-Born %                |                    | -5.80**         |                 | -1.23**         |                         | -4.84*          |
|                               |                    | (2.17)          |                 | (0.49)          |                         | (2.73)          |
| Black %                       |                    | 4.80***         |                 | -0.12           |                         | 0.64            |
|                               |                    | (1.75)          |                 | (0.48)          |                         | (2.15)          |
| Other Non-White %             |                    | -22.89***       |                 | -9.170***       |                         | -8.04           |
|                               |                    | (5.28)          |                 | (2.26)          |                         | (11.51)         |
| Urban Population %            |                    | 4.627***        |                 | 0.25            |                         | 3.251*          |
|                               |                    | (1.17)          |                 | (0.28)          |                         | (1.76)          |
| State Fixed Effects           | <i>included</i>    | <i>included</i> | <i>included</i> | <i>included</i> | <i>included</i>         | <i>included</i> |
| Year Fixed Effects            | <i>included</i>    | <i>included</i> | <i>included</i> | <i>included</i> | <i>included</i>         | <i>included</i> |
| Observations                  | 304                | 288             | 232             | 218             | 280                     | 265             |
| R-squared                     | 0.95               | 0.97            | 0.84            | 0.90            | 0.88                    | 0.89            |

Note: Table entries are regression coefficients, with standard errors clustered by state in parentheses. \*\*\* p<0.01, \*\* p<0.05, \* p<0.10 in a one-tailed test.
